# Supplementary material
Source: publisher figshare collection journal article supplement (https://frontiersin.figshare.com/ndownloader/files/13438400)
Supplement: Supplementary file [file 13438400]

## SUPPLEMENTARY MATERIAL

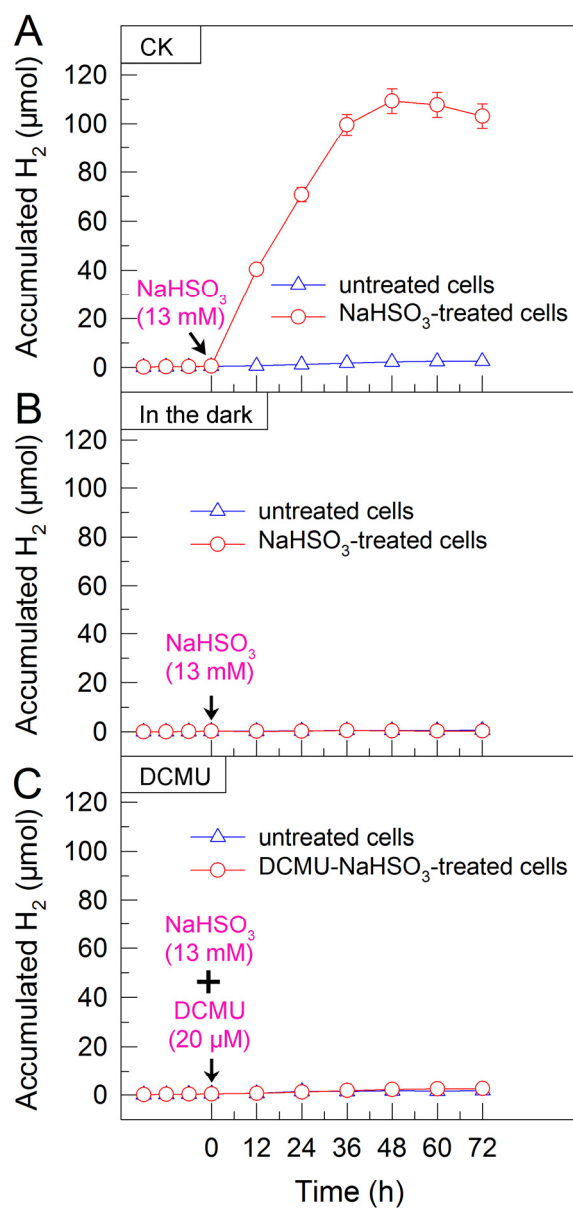

**Supplementary Figure S1 Effects of dark incubation and DCMU addition on  $H_2$  production in NaHSO<sub>3</sub>-treated cells of *C. reinhardtii*.** Production of  $H_2$  under photon flux densities of  $200 \mu\text{mol photons m}^{-2}\text{s}^{-1}$  by NaHSO<sub>3</sub> addition (**A**) was almost completely suppressed in cells incubated in the dark (**B**) or treated with DCMU (**C**). Values are means  $\pm$  SD ( $n = 6$ ). CK, control check.
